# Supplementary material
Source: Springer Nature journal article supplement (https://www.springermedizin.de/resource/supplementary/12890_2012_395_MOESM1_ESM.pdf/9505100)

Evolution of the Glasgow Coma Scale (GSC).

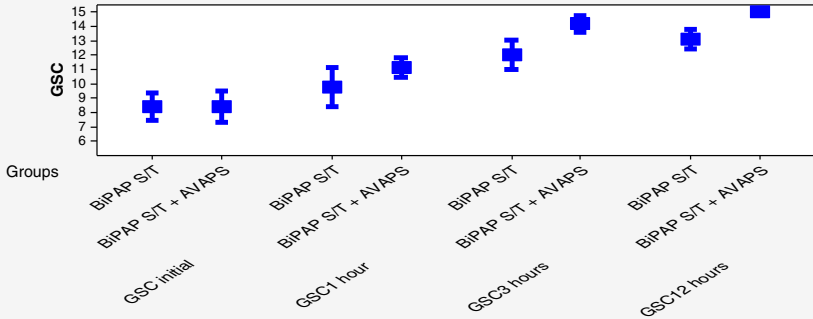

Supplement: MOESM1 [file 9505100]
